# Supplementary material for: The Taxus genome provides insights into paclitaxel biosynthesis
Source: PubMed Central journal article supplement (PMC8367818; doi:10.1038/s41477-021-00963-5), 2021-07-15
Supplement: 41477_2021_963_MOESM4_ESM.pdf [file 41477_2021_963_MOESM4_ESM.pdf]

## Additional Supplementary Fig.4c

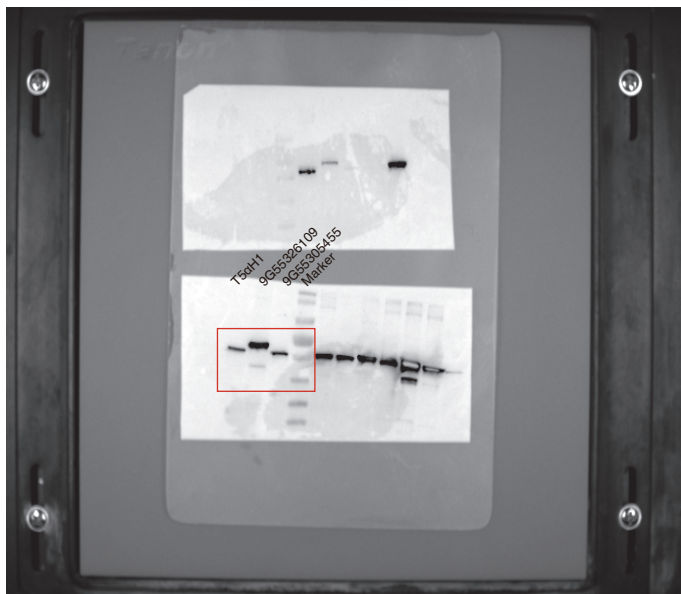

Unprocessed gel scan file

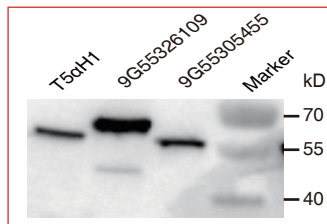

The gel figure on display
